# Supplementary material for: Social Vulnerability and Risk of Suicide in US Adults, 2016-2020
Source: PubMed Central journal article supplement (PMC10134005; doi:10.1001/jamanetworkopen.2023.9995), 2023-04-26
Supplement: jamanetwopen-e239995-s001.pdf [file jamanetwopen-e239995-s001.pdf]

## Data Sharing Statement

Liu. Social Vulnerability and Risk of Suicide in US Adults, 2016-2020. *JAMA Netw Open*.  
Published April 26, 2023. doi:10.1001/jamanetworkopen.2023.9995

### Data

**Data available:** No

### Additional Information

**Explanation for why data not available:** Data used as part of this brief report were publicly accessible. The data sets can be found on the CDC WONDER website.
